# Supplementary material for: Chemoradiotherapy Combined with Brachytherapy for the Definitive Treatment of Esophageal Carcinoma
Source: MDPI journal article supplement (doi:10.3390/cancers15143594), 2023-07-12
Supplement: s1 [file s1]

**Table S1.** S: Comparison of acute toxicity in patients receiving BT or EBRT boost versus BT and EBRT boost.

| Acute Toxicity Grade | BT or EBRT Boost |          | BT and EBRT Boost |          |
|----------------------|------------------|----------|-------------------|----------|
|                      | N Patients       | Rate (%) | N Patients        | Rate (%) |
| 0                    | 2                | 2.4%     | 2                 | 3.2%     |
| 1                    | 22               | 25.9%    | 27                | 42.9%    |
| 2                    | 46               | 54.1%    | 24                | 38.1%    |
| 3                    | 13               | 15.3%    | 9                 | 14.3%    |
| 4                    | 1                | 1.2%     | 0                 | 0.0%     |
| 5                    | 1                | 1.2%     | 1                 | 1.6%     |

**Table S2.** Comparison of late toxicity in patients receiving BT or EBRT boost versus BT and EBRT boost.

| Late Toxicity Grade | BT or EBRT Boost |          | BT and EBRT Boost |          |
|---------------------|------------------|----------|-------------------|----------|
|                     | N Patients       | Rate (%) | N Patients        | Rate (%) |
| 0                   | 61               | 71.8%    | 37                | 58.7%    |
| 1                   | 7                | 8.2%     | 8                 | 12.7%    |
| 2                   | 5                | 5.9%     | 4                 | 6.3%     |
| 3                   | 9                | 10.6%    | 10                | 15.9%    |
| 4                   | 1                | 1.2%     | 1                 | 1.6%     |
| 5                   | 2                | 2.4%     | 3                 | 4.8%     |

**Table S3.** Odds ratios (OR) for receiving brachytherapy before and after propensity score matching (PSM).

|            | Before PSM (N = 183) |        |       |          | After PSM (N = 94) |        |       |          |
|------------|----------------------|--------|-------|----------|--------------------|--------|-------|----------|
|            | OR                   | 95% CI |       | <i>p</i> | OR                 | 95% CI |       | <i>p</i> |
|            |                      | Lower  | Upper |          |                    | Lower  | Upper |          |
| age        | 0.99                 | 0.96   | 1.02  | 0.325    | 0.97               | 0.93   | 1.01  | 0.161    |
| UICC stage | 0.63                 | 0.46   | 0.85  | 0.003    | 0.90               | 0.59   | 1.35  | 0.600    |
| KPS        | 1.05                 | 0.84   | 1.31  | 0.697    | 1.01               | 0.75   | 1.36  | 0.940    |
| grade      | 1.16                 | 0.67   | 2.04  | 0.596    | 1.31               | 0.60   | 2.82  | 0.498    |
| location   | 1.48                 | 1.01   | 2.16  | 0.043    | 1.12               | 0.66   | 1.90  | 0.685    |
| histology  | 0.87                 | 0.45   | 1.67  | 0.679    | 0.92               | 0.41   | 2.07  | 0.836    |

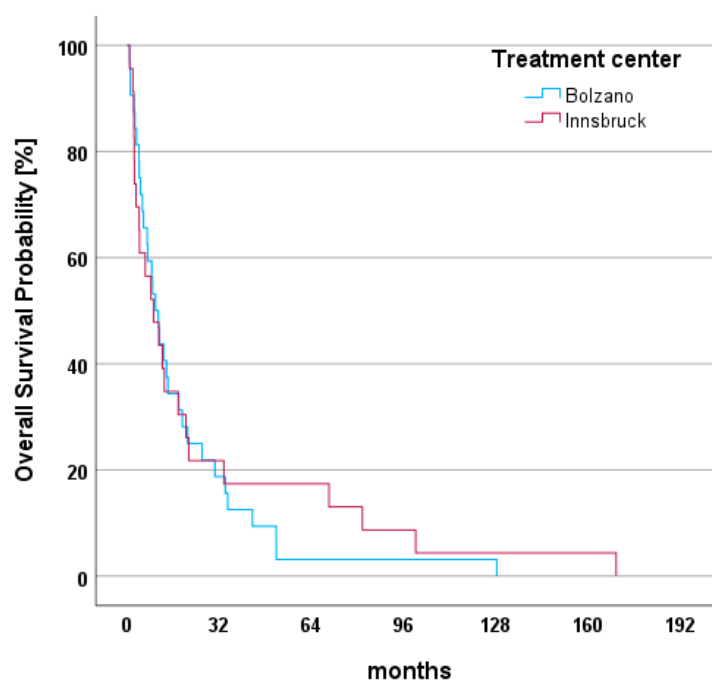

**Figure S1.** Kaplan Meier plots of center specific survival. Analysis of patients with comparable characteristics and treatment not receiving brachytherapy.

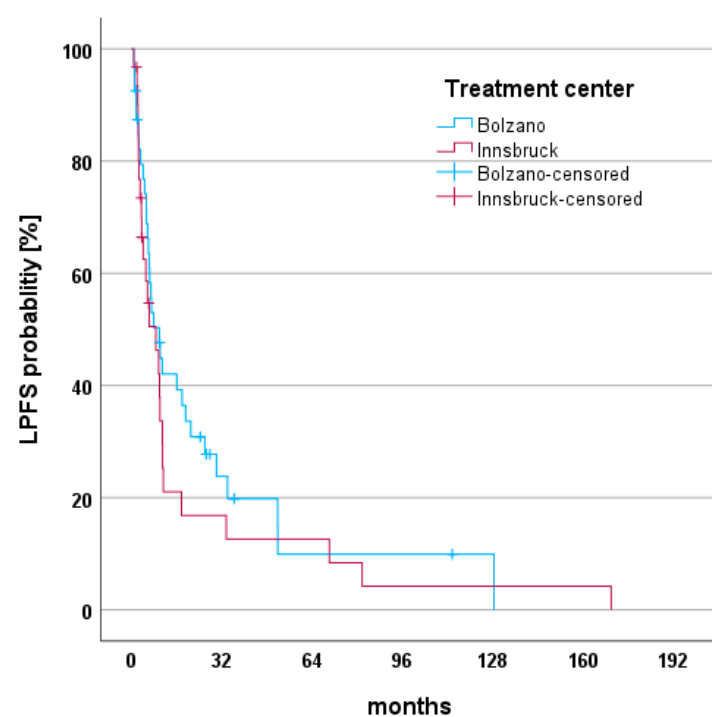

**Figure S2.** Kaplan Meier plots of center specific LPFS. Analysis of patients with comparable characteristics and treatment not receiving brachytherapy.
